# Supplementary material for: Engineering yeast for the production of plant terpenoids using synthetic biology approaches
Source: Royal Society of Chemistry journal article supplement (doi:10.1039/d3np00005b), 2023-01-01
Supplement: d3np00005b1.pdf [file d3np00005b1.pdf]

## SUPPLEMENTARY INFORMATION

### **Engineering yeast for production of plant terpenoids using synthetic biology approaches**

Jean-Alexandre Bureau<sup>1</sup>, Magdalena Escobar Oliva<sup>1</sup>, Yueming Dong<sup>1</sup>, and Codruta Ignea<sup>1\*</sup>

<sup>1</sup>Department of Bioengineering, McGill University, Montreal, QC, Canada, H3A 0C3

\*Corresponding author: Codruta Ignea, e-mail: [codruta.ignea@mcgill.ca](mailto:codruta.ignea@mcgill.ca)

## SUPPLEMENTARY TABLES

**Table S1: Reports on engineering approaches for production of plant terpenoids.**

| <b>Production Platform</b>       | <b>Biosynthetic pathway</b>                                                         | <b>Target Terpenoid</b>                    | <b>Titer</b>                                                                                        | <b>Ref.</b>   |
|----------------------------------|-------------------------------------------------------------------------------------|--------------------------------------------|-----------------------------------------------------------------------------------------------------|---------------|
| <i>Salvia miltiorrhiza</i>       | Hairy roots cultures                                                                | tanshinones                                | 2.51-2.89-fold increase of major tanshinones                                                        | <sup>1</sup>  |
| <i>Centella asiatica</i>         | Cell suspensions derived from callus cultures                                       | centellosides, madecassoside, asiaticoside | 900 µg/g DW                                                                                         | <sup>2</sup>  |
| <i>Nicotiana benthamiana</i>     | Heterologous expression of lipid transfer proteins                                  | artemisinin                                | 3 µg/g DW                                                                                           | <sup>3</sup>  |
| <i>N. benthamiana</i>            | Organelle compartmentalization                                                      | geraniol                                   | 129 µg/g FW                                                                                         | <sup>4</sup>  |
| <i>N. benthamiana</i>            | Metabolic pathway shunting                                                          | taxa-4(5),11(12)-diene                     | 48 µg/g DW                                                                                          | <sup>5</sup>  |
| <i>Physcomitrella patens</i>     | Heterologous expression                                                             | taxa-4(5),11(12)-diene                     | 0.05% fresh weight of tissue                                                                        | <sup>6</sup>  |
| <i>Chlamydomonas reinhardtii</i> | Redirecting the metabolic flux through the MEP pathway                              | sclareol                                   | up to 656 mg L <sup>-1</sup> with a maximal productivity of 78 mg L <sup>-1</sup> day <sup>-1</sup> | <sup>7</sup>  |
| <i>E. coli</i>                   | Multivariate-modular approach                                                       | taxa-4(5),11(12)-diene                     | 1.02 g L <sup>-1</sup>                                                                              | <sup>8</sup>  |
| <i>E. coli</i>                   | CRISPR/Cas9 mediated genome integration                                             | β-carotene                                 | 2.0 g L <sup>-1</sup>                                                                               | <sup>9</sup>  |
| <i>in vitro</i> platform         | Synthetic crotonyl-coenzyme (CoA)/ethylmalonyl-CoA/hydroxybutyryl-CoA cycle (CETCH) | limonene<br>farnesene                      | 0.22 mg L <sup>-1</sup> h <sup>-1</sup>                                                             | <sup>10</sup> |
| <i>in vitro</i> platform         | cell-free system                                                                    | cannabinoids<br>cannabigerolic acid (CBGA) | ~0.5 g L <sup>-1</sup>                                                                              | <sup>11</sup> |

**Table S2: Overview of heterologous biosynthetic pathway expression for sesquiterpenoid production in *S. cerevisiae*.** Examples of terpenoids produced by industrial fermentation are denoted with \*.

| Product                     | Biosynthetic pathway                                                                                                                | Approach                                                                                                                                                               | Titer                   | Ref.          |
|-----------------------------|-------------------------------------------------------------------------------------------------------------------------------------|------------------------------------------------------------------------------------------------------------------------------------------------------------------------|-------------------------|---------------|
| nerolidol                   | Amorpha-4,11-diene synthase (ADS) from <i>Artemisia annua</i>                                                                       | Compartmentalization in the mitochondria                                                                                                                               | 427 mg L <sup>-1</sup>  | <sup>12</sup> |
| nerolidol                   | Amorpha-4,11-diene synthase (ADS) and Cytochrome P450 monooxygenase (CYP71AV1) from <i>Artemisia annua</i>                          | Multiple metabolic engineering approaches                                                                                                                              | 25 g L <sup>-1</sup>    | <sup>13</sup> |
| $\alpha$ -santalene         | Santalene synthase (SaSSy) from <i>Santalum album</i> and SanSyn from <i>Clausena lansium</i>                                       | SanSyn (F441V), deletion of the yeast transcriptional repressor ROX1 and knockout of the genes encoding the enzymes involved in farnesyl diphosphate (FPP) consumption | 842 mg L <sup>-1</sup>  | <sup>14</sup> |
| santalol                    | Santalene synthase (SaSSy) from <i>Santalum album</i> and SanSyn from <i>Clausena lansium</i> , and CYP736A167 from <i>S. album</i> | SanSyn (F441V), deletion of the yeast transcriptional repressor ROX1 and knockout of the genes encoding the enzymes involved in farnesyl diphosphate (FPP) consumption | 1.07 g L <sup>-1</sup>  | <sup>14</sup> |
| <i>trans</i> -caryophyllene | <i>trans</i> -caryophyllene synthase from <i>S. fruticosa</i>                                                                       | Tandem heterozygous deletions positive genetic interactors of HMG2                                                                                                     | 125 mg L <sup>-1</sup>  | <sup>15</sup> |
| $\beta$ -farnesene*         | $\beta$ -farnesene synthase (FS) from <i>Artemisia apiacea</i>                                                                      | Genome scale modification to reprogram yeast central metabolism                                                                                                        | 130 g L <sup>-1</sup>   | <sup>16</sup> |
| patchoulol                  | Patchoulol synthase (PTS) from <i>Pogostemon cablin</i>                                                                             | Fusion of farnesyl diphosphate synthase (FPPS) and PTS in ERG9-repressed strain                                                                                        | 23 mg L <sup>-1</sup>   | <sup>17</sup> |
| kauniolide                  | Germacrene A (GAS), costunolide (COS), kauniolide (KAS) synthases, germacrene A oxidase (GAO)                                       | Multigene Crispr/Cas9 mediated chromosomal integration                                                                                                                 | nd                      | <sup>18</sup> |
| <i>trans</i> -nerolidol     | <i>trans</i> -nerolidol synthase (NES1) from <i>Actinidia chinensis</i>                                                             | Chromosomal gene amplification driven by gen haploinsufficiency                                                                                                        | ~2 g L <sup>-1</sup>    | <sup>19</sup> |
| <i>trans</i> -nerolidol     | <i>trans</i> -nerolidol synthase (NES1) from <i>Actinidia chinensis</i>                                                             | PEST sequence-dependent endoplasmic reticulum-associated protein degradation (ERAD) system established for Erg9p                                                       | ~100 mg L <sup>-1</sup> | <sup>20</sup> |

**Table S3: Overview of heterologous biosynthetic pathway expression for monoterpene production in yeast.** The majority of case studies listed below are engineered in *S. cerevisiae* terpene-producing platforms. Examples of terpenoids produced in *Y. lipolytica* are marked with \*, while in *R. toruloides* are shown with \*\*.

| Product               | Biosynthetic pathway                                                                                                | Approach                                                                                  | Titer                                                                           | Ref.                           |
|-----------------------|---------------------------------------------------------------------------------------------------------------------|-------------------------------------------------------------------------------------------|---------------------------------------------------------------------------------|--------------------------------|
| limonene              | Limonene synthase from <i>Citrus limon</i> (CILimS)                                                                 | Orthogonal pathway using NPP as isomeric alternative substrate                            | 166 mg L <sup>-1</sup> in semi-fed batch<br>917 mg L <sup>-1</sup> in fed batch | <sup>21</sup><br><sup>22</sup> |
| limonene              | Limonene synthase from <i>Citrus limon</i> (CILimS)                                                                 | Compartmentalization in peroxisomes                                                       | 2.6 g L <sup>-1</sup> in semi-fed batch                                         | <sup>23</sup>                  |
| limonene*             | Limonene synthase from <i>Citrus limon</i> (CILimS)                                                                 | Overexpressing YALI0F19492p                                                               | 5.11 mg L <sup>-1</sup>                                                         | <sup>24</sup>                  |
| limonene**            | Limonene synthase from <i>Citrus limon</i> (CILimS)                                                                 | Fusion of CILimS with <i>cis</i> prenyl transferase NPPS from <i>Solanum lycopersicum</i> | 15.45 g L <sup>-1</sup>                                                         | <sup>25</sup>                  |
| sabinene              | Sabinene synthase from <i>Salvia pomifera</i> (SpSabS)                                                              | Orthogonal pathway using NPP as isomeric alternative substrate                            | 113 mg L <sup>-1</sup> in semi-fed batch                                        | <sup>21</sup>                  |
| <i>trans</i> -sabinol | Sabinene synthase from <i>Salvia pomifera</i> (SpSabS), and Sabinene hydroxylase CYP750B1 from <i>Thuja plicata</i> | Orthogonal pathway using NPP as isomeric alternative substrate                            | nd                                                                              | <sup>21</sup>                  |
| $\alpha$ -pinene      | $\alpha$ -pinene synthase from <i>Pinus taeda</i> (PtPinS)                                                          | Orthogonal pathway using NPP as isomeric alternative substrate                            | nd                                                                              | <sup>21</sup>                  |
| 1,8-cineole           | 1,8-cineole synthase from <i>Salvia fruticosa</i>                                                                   | Orthogonal pathway using NPP as isomeric alternative substrate                            | nd                                                                              | <sup>21</sup>                  |
| geraniol              | Geraniol synthase from <i>Ocimum basilicum</i>                                                                      | Compartmentalization in peroxisomes                                                       | 5.52 g L <sup>-1</sup> in semi-fed batch                                        | <sup>23</sup>                  |
| linalool              | Linalool synthase from diterpene <i>Mentha citrate</i> (McLIS)                                                      | Iterative design–build–test–learn engineering cycle                                       | ~0.3 mg L <sup>-1</sup>                                                         | <sup>26</sup>                  |

**Table S4: Overview of heterologous expression of terpene synthase and decoration enzymes for diterpenoid production in *S. cerevisiae*.**

| Product        | Terpene synthase                                                                                                                                        | Decoration enzyme                                                                                          | Approach                                                                             | Titer                                            | Ref.          |
|----------------|---------------------------------------------------------------------------------------------------------------------------------------------------------|------------------------------------------------------------------------------------------------------------|--------------------------------------------------------------------------------------|--------------------------------------------------|---------------|
| miltiradiene   | Labdadienyl/copalyl diphosphate synthase ( <i>SmCPS</i> ) and kaurene synthase-like ( <i>SmKSL</i> ) from <i>Salvia miltiorrhiza</i>                    |                                                                                                            | Fusion of <i>SmCPS</i> and <i>SmKSL</i> and fusion of <i>Bts1p</i> and <i>Erg20p</i> | 365 mg L <sup>-1</sup>                           | <sup>27</sup> |
| sclareol       | Class II diterpene synthase and sclareol synthase from <i>Salvia sclarea</i>                                                                            |                                                                                                            | Global metabolic rewiring                                                            | 11.4 g L <sup>-1</sup> in fed-batch fermentation | <sup>28</sup> |
| manool         | Copalyl diphosphate synthase from <i>S. fruticosa</i> and sclareol synthase from <i>S. sclarea</i>                                                      |                                                                                                            | Combinatorial biosynthesis                                                           | 96 mg L <sup>-1</sup>                            | <sup>29</sup> |
| manoyl oxide   | 8-hydroxy copalyl diphosphate synthase ( <i>CcCLS</i> ) from <i>Cistus creticus</i> and miltiradiene synthase from <i>S. pomifera</i> ( <i>SpMILS</i> ) |                                                                                                            | Combinatorial biosynthesis                                                           | 36 mg L <sup>-1</sup>                            | <sup>29</sup> |
| ferruginol     | Copalyl diphosphate synthase from <i>S. fruticosa</i> and miltiradiene synthase from <i>S. pomifera</i> ( <i>SpMILS</i> )                               | CPR/CYP76AH24 from <i>Salvia pomifera</i>                                                                  | Gene mining, pathway elucidation                                                     | 21.2 mg L <sup>-1</sup>                          | <sup>27</sup> |
| carnosic acid  | Copalyl diphosphate synthase from <i>S. fruticosa</i> and miltiradiene synthase from <i>S. pomifera</i> ( <i>SpMILS</i> )                               | CPR/CYP76AH24 and CYP76AK6 from <i>S. pomifera</i>                                                         | Gene mining, pathway elucidation                                                     | 1 mg L <sup>-1</sup>                             | <sup>27</sup> |
| pisiferic acid | Copalyl diphosphate synthase from <i>S. fruticosa</i> and miltiradiene synthase from <i>S. pomifera</i> ( <i>SpMILS</i> )                               | Cytochrome P450s from <i>S. pomifera</i> CYP76AH24 (F112L) and CYP76AK6                                    | Rational mutagenesis of CYP76AH24                                                    | 2.65 mg L <sup>-1</sup>                          | <sup>30</sup> |
| salviol        | Copalyl diphosphate synthase from <i>S. fruticosa</i> and miltiradiene synthase from <i>S. pomifera</i> ( <i>SpMILS</i> )                               | Cytochrome P450s from <i>S. pomifera</i> CYP76AH24 (F112L) and CYP71BE52                                   | Rational mutagenesis of CYP76AH24                                                    | mg L <sup>-1</sup>                               | <sup>30</sup> |
| forskolin      | CfTPS2 and CfTPS3 from <i>Coleus forskohlii</i>                                                                                                         | NADPH-dependent cytochrome P450 oxidoreductase (CfPOR), CfCYP76AH15, CfCYP76AH11, CfCYP76AH16 and CfACT1-8 | Pathway elucidation                                                                  | 40 mg L <sup>-1</sup>                            | <sup>31</sup> |
| casbene        | Geranylgeranyl diphosphate synthase from <i>Phomopsis</i>                                                                                               |                                                                                                            | Ergosterol and glucose-                                                              | 108.5 mg L <sup>-1</sup>                         | <sup>32</sup> |

|                                                                      |                                                                                     |                                                                                                                                                                    |                                                                   |                                                    |                                |
|----------------------------------------------------------------------|-------------------------------------------------------------------------------------|--------------------------------------------------------------------------------------------------------------------------------------------------------------------|-------------------------------------------------------------------|----------------------------------------------------|--------------------------------|
|                                                                      | <i>amygdali</i> (PaGGPPS) and casbene synthase from <i>Ricinus communis</i> (RcCBS) |                                                                                                                                                                    | sensitive promoter-controlled expression of ERG1, ERG9 and ERG20  |                                                    |                                |
| taxadiene                                                            | Taxadiene synthase (TASY) from <i>Taxus cuspidata</i>                               |                                                                                                                                                                    | Multi-chromosomal integrations and improved enzyme solubility     | 129 mg L <sup>-1</sup> in shake-flask fermentation | <sup>33</sup>                  |
| taxadien-5 $\alpha$ -ol                                              | Taxadiene synthase (TASY) from <i>Taxus cuspidata</i>                               | Taxadiene-5 $\alpha$ -hydroxylase (CYP725A4) from <i>Taxus cuspidata</i>                                                                                           | Optimization of substrate channeling through heterologous pathway | 10.6 mg L <sup>-1</sup>                            | <sup>34</sup><br><sup>35</sup> |
| taxa-4(20),11(12)-dien-5 $\alpha$ -acetoxy-10 $\beta$ -ol (putative) | Taxadiene synthase from <i>T. brevifolia</i>                                        | Taxadiene 5 $\alpha$ -hydroxylase, Taxadien-5 $\alpha$ -ol acetyltransferase (TAT) and taxane 10 $\beta$ -hydroxylase (10 $\beta$ CYP) from <i>Taxus cuspidata</i> | <i>E. coli</i> and <i>S. cerevisiae</i> co-culture system         | 1 mg L <sup>-1</sup>                               | <sup>36</sup>                  |
| triptonide                                                           | Miltiradiene biosynthetic pathway                                                   | CYP82D213, CYP82D274, CYP71BE86 and CYP71BE85 from <i>T. willfordii</i>                                                                                            | Pathway reconstructon                                             | 3.79 mg L <sup>-1</sup>                            | <sup>37</sup>                  |

**Table S5: Overview of heterologous expression of terpene synthase and decoration enzymes for triterpenoid production in yeast.** Most case studies listed below are engineered in *S. cerevisiae* terpene-producing platforms. Examples of terpenoids produced in *Y. lipolytica* are marked with \*.

| Product                 | Terpene synthase                                           | Decoration enzyme                                                                                                     | Approach                                                                                | Titer                                                            | Ref.          |
|-------------------------|------------------------------------------------------------|-----------------------------------------------------------------------------------------------------------------------|-----------------------------------------------------------------------------------------|------------------------------------------------------------------|---------------|
| $\beta$ -amyrin         | $\beta$ -amyrin synthase (SAD1) from <i>Avena strigosa</i> |                                                                                                                       | Site directed mutagenesis of SAD1                                                       | nd                                                               | <sup>38</sup> |
| friedelin               | Oxidosqualene cyclase (OSC4) from <i>T. willfordii</i>     |                                                                                                                       | Deletion of ubiquitin conjugating enzyme UBC7                                           | 0.5 mg L <sup>-1</sup>                                           | <sup>39</sup> |
| polpunic acid           | Oxidosqualene cyclase (OSC4) from <i>T. willfordii</i>     | CYP712K1 from <i>T. willfordii</i>                                                                                    | Deletion of ubiquitin conjugating enzyme UBC7                                           | 1.4 mg L <sup>-1</sup>                                           | <sup>39</sup> |
| protopanaxadiol         | Dammarenediol-II synthase (DDS) from <i>Panax ginseng</i>  | Protopanaxadiol synthase (PPDS) from <i>P. ginseng</i>                                                                | Upstream pathway optimization                                                           | 1189 mg L <sup>-1</sup> by two-phase fermentation                | <sup>40</sup> |
| betulinic acid*         | Lupeol synthase from <i>R. communis</i> (RcLus)            | Lupeol C-28 oxidase <i>BPLO</i> (CYP716A180) from <i>Betula platyphylla</i>                                           | Upstream pathway optimization and improved CYP/CPR interactions in <i>Y. lipolytica</i> | 51.87 mg L <sup>-1</sup>                                         | <sup>41</sup> |
| lupeol                  | Lupeol synthase from <i>Taraxacum koksaghyz</i>            |                                                                                                                       | Enhanced metabolic flux through MVA pathway                                             | 0.16 mg g <sup>-1</sup> CDW                                      | <sup>42</sup> |
| ginsenosides Rg3        | Dammarenediol-II synthase (DDS) from <i>P. ginseng</i>     | Protopanaxadiol synthase (PPDS) and <i>PgUGT74AE2</i> and <i>PgUGT94Q2</i> from <i>P. ginseng</i>                     | Pathway discovery                                                                       | 1.3 mg L <sup>-1</sup>                                           | <sup>43</sup> |
| ginsenosides Rd         | Dammarenediol-II synthase (DDS) from <i>P. ginseng</i>     | Protopanaxadiol synthase (PPDS) and <i>PgUGT71A27</i> , <i>PgUGT74AE2</i> and <i>PgUGT94Q2</i> from <i>P. ginseng</i> | Pathway discovery                                                                       | nd                                                               | <sup>43</sup> |
| ginsenosides Rh1 and F1 | Dammarenediol-II synthase (DDS) from <i>P. ginseng</i>     | Protopanaxadiol synthase (PPDS) and <i>PgUGTPg100</i> from <i>P. ginseng</i>                                          |                                                                                         | 92.8 mg L <sup>-1</sup> , 42.1 mg L <sup>-1</sup> , respectively | <sup>44</sup> |
| ginsenosides Rh2        | Dammarenediol-II synthase (DDS) from <i>Panax ginseng</i>  | Protopanaxadiol synthase (PPDS) from <i>P. ginseng</i> and <i>UGTPn50</i> from <i>P. notoginseng</i>                  | Directed evolution of <i>UGTPn50</i> from <i>P. notoginseng</i>                         | 2.25 g L <sup>-1</sup> in fed-batch fermentation                 | <sup>45</sup> |
| ginsenosides            | Dammarenediol-II                                           | Protopanaxadiol                                                                                                       | Pathway Optimization                                                                    | 1.3 g L <sup>-1</sup>                                            | <sup>46</sup> |

|                    |                                                                 |                                                                                                    |                      |                       |               |
|--------------------|-----------------------------------------------------------------|----------------------------------------------------------------------------------------------------|----------------------|-----------------------|---------------|
| Rg2                | synthase (DDS)<br>from <i>Panax ginseng</i>                     | synthase (PPDS),<br>CYP716A53v2 and<br><i>PgUGT71A54</i>                                           |                      |                       |               |
| ginsenosides<br>Re | Dammarenediol-II<br>synthase (DDS)<br>from <i>Panax ginseng</i> | protopanaxadiol<br>synthase (PPDS),<br>CYP716A53v2 and<br><i>PgUGT71A53</i> ,<br><i>PgUGT71A54</i> | Pathway Optimization | 3.6 g L <sup>-1</sup> | <sup>46</sup> |

**Table S6: Overview of heterologous expression of terpene synthase and decoration enzymes for carotenoid production in yeast.** Most case studies listed below are engineered in *S. cerevisiae* terpene-producing platforms. Examples of terpenoids produced in *Y. lipolytica* are marked with \*.

| Product        | Terpene synthase                                                          | Decoration enzyme                                                                                                 | Approach                                                                                       | Titer                                            | Ref.          |
|----------------|---------------------------------------------------------------------------|-------------------------------------------------------------------------------------------------------------------|------------------------------------------------------------------------------------------------|--------------------------------------------------|---------------|
| lycopene       | Phytoene synthase (CrtB)                                                  | Phytoene desaturase (CrtI)                                                                                        | Improve lipid oil-triacylglycerol (TAG) metabolism                                             | 2.37 g L <sup>-1</sup> in fed-batch fermentation | <sup>47</sup> |
| β-carotene     | Phytoene synthase/<br>lycopene cyclase (CrtYB)                            | Phytoene desaturase (CrtI)                                                                                        | Enzyme fusion strategy creating tridomain CrtYBI enzyme                                        | ~3 mg L <sup>-1</sup> DCW                        | <sup>48</sup> |
| β-carotene*    | Phytoene synthase/<br>lycopene cyclase (CrtYB)                            | Phytoene desaturase (CrtI), β-carotene ketolase (CrtW), β-carotene hydroxylase (CrtZ), β-carotene ketolase (OBKT) | Overexpressing of GGPP synthase, ERG13, and HMG                                                | 4.5 g L <sup>-1</sup> in fermentation            | <sup>49</sup> |
| astaxanthin    | Phytoene synthase/<br>lycopene cyclase (CrtYB)                            | Phytoene desaturase (CrtI), β-carotene ketolase (CrtW), β-carotene hydroxylase (CrtZ), β-carotene ketolase (OBKT) | Rational mutagenesis of β-carotene ketolase, overexpression of CrtE03M, tHMG1, CrtI and CrtYB  | 47.18 mg L <sup>-1</sup>                         | <sup>50</sup> |
| zeaxanthin     | GGPP synthase (CrtE), phytoene synthase (CrtB)<br>lycopene cyclase (CrtY) | Phytoene desaturase (CrtI)                                                                                        | Combined ligase cycling reaction with DNA assembler for larger plasmid assembly <i>in vivo</i> | 2.4 mg L <sup>-1</sup>                           | <sup>51</sup> |
| canthaxanthin* | Phytoene synthase/<br>lycopene cyclase (carRP)                            | Phytoene dehydrogenase (carB) and β-carotene/zeaxanthin 4-ketolase (CrtW)                                         | Chromosomal expression of β-carotene biosynthetic pathway                                      | 36.1 mg L <sup>-1</sup>                          | <sup>52</sup> |



**Table S7: Overview of strategies for engineering biosynthetic enzymes involved in terpene upstream pathway.**

| Wild-type enzyme                                               | Protein engineering strategy | Engineered mutations             | Engineered activity                                                                       | Ref. |
|----------------------------------------------------------------|------------------------------|----------------------------------|-------------------------------------------------------------------------------------------|------|
| Farnesyl pyrophosphate synthetase (Erg20p)                     | Site-directed mutagenesis    | F96W-N127W                       | Dominant negative GPP synthase<br>343-fold improvement in sabinene production             | 53   |
| Farnesyl pyrophosphate synthetase (Erg20p)                     | Site-directed mutagenesis    | F96C                             | GGPP synthase<br>70-fold improvement in sclareol production                               | 54   |
| Farnesyl pyrophosphate synthetase (Erg20p)                     | Degradation signal addition  | N-terminal degron K3K15 addition | Decreased half-life<br>27-fold improvement in monoterpene production                      | 55   |
| <i>Citrus lemon</i> Limonene synthase (C <i>LimS</i> )         | Site-directed mutagenesis    | H570F or Y                       | NPP dedicated variant<br>Shift substrate preference from GPP to NPP                       | 21   |
| <i>S. pomifera</i> Sabinene synthase (S <i>pSabS</i> )         | Site-directed mutagenesis    | H561F                            | NPP dedicated variant.<br>7-fold increase in sabinene titer                               | 21   |
| <i>Citrus lemon</i> Limonene synthase (C <i>LimS</i> )         | Site-directed mutagenesis    | H570V, L or I                    | Noncanonical C11 variant<br>Accepts 2-methyl-GPP to produce 2-methyllimonene              | 56   |
| <i>Salvia fruticosa</i> 1,8-cineole synthase (S <i>fCinS</i> ) | Site-directed mutagenesis    | F571Y                            | Noncanonical C11 variant<br>Accepts 2-methyl-GPP to produce 2-methyl- $\alpha$ -terpineol | 56   |
| <i>S. fruticosa</i> 1,8-cineole synthase (S <i>fCinS</i> )     | Site-directed mutagenesis    | N388S-I451A                      | Noncanonical C11 variant<br>Accepts 2-methyl-GPP to produce 2-methylmyrcene               | 56   |
| <i>Pinus taeda</i> Pinene synthase (P <i>tPinS</i> )           | Site-directed mutagenesis    | F579V                            | Noncanonical C11 variant<br>Accepts 2-methyl-GPP to produce 2-methylinalool               | 56   |
| <i>Ocimum basilicum</i> Myrcene synthase (O <i>bMyrS</i> )     | Site-directed mutagenesis    | F607L                            | Noncanonical C11 variant<br>Accepts 2-methyl-GPP to produce 2-methylinalool               | 56   |
| <i>Avena strigosa</i> $\beta$ -amyrin synthase (SAD1)          | Site-directed mutagenesis    | S728F                            | Preferentially converts dioxidosqualene (over oxidosqualene) to dammarane                 | 38   |
| <i>Arabidopsis thaliana</i> Lupeol synthase (A <i>tLUP1</i> )  | Site-directed mutagenesis    | T729F                            | Preferentially converts dioxidosqualene to epoxydammaranes                                | 38   |
| <i>Clausena lansium</i> Santalene synthase                     | Site-directed mutagenesis    | F441V                            | Changed product specificity;<br>Sandalwood oil-like sesquiterpene profile                 | 14   |
| Isoprene synthase (ISPS)                                       | Combinatorial mutagenesis    | F338-V341-F485                   | 4-fold improvement in isoprene yield                                                      | 57   |

**Table S8: Reports of engineering cytochrome P459s involved in terpene biosynthesis.**

| <b>Wild-type enzyme</b>              | <b>Wild-type activity</b>                | <b>Protein engineering strategy</b> | <b>Engineered mutations</b>           | <b>Engineered activity</b>                                                                                                  | <b>Ref.</b>   |
|--------------------------------------|------------------------------------------|-------------------------------------|---------------------------------------|-----------------------------------------------------------------------------------------------------------------------------|---------------|
| <i>Salvia pomifera</i><br>CYP76AH24  | Miltiradiene/<br>Abietatriene<br>oxidase | Site-directed<br>mutagenesis        | F112L                                 | Improved product<br>specificity for<br>ferruginol;<br>Increased production of<br>downstream minor<br>products by 14-24-fold | <sup>30</sup> |
| <i>Pinus taeda</i><br>CYP720B1       | Abietadienol/<br>abietadienal<br>oxidase | Rational<br>mutagenesis             | G359A                                 | Improved product<br>specificity for 18-<br>hydroxy-miltiradiene; 2-<br>fold higher efficiency<br>than wild-type enzyme.     | <sup>29</sup> |
| <i>Pinus taeda</i><br>CYP720B1       | Abietadienol/<br>abietadienal<br>oxidase | Rational<br>mutagenesis             | T295S                                 | Relaxed product<br>specificity                                                                                              | <sup>29</sup> |
| <i>Pinus taeda</i><br>CYP720B1       | Abietadienol/<br>abietadienal<br>oxidase | Rational<br>mutagenesis             | T295S-I223G                           | Improved product<br>specificity for 19-<br>hydroxy-miltiradiene                                                             | <sup>29</sup> |
| <i>Pinus taeda</i><br>CYP720B1       | Abietadienol/<br>abietadienal<br>oxidase | Rational<br>mutagenesis             | L123V-I223L                           | Improved product<br>specificity for 3 $\beta$ -<br>hydroxy-manool                                                           | <sup>29</sup> |
| <i>Pinus taeda</i><br>CYP720B1       | Abietadienol/<br>abietadienal<br>oxidase | Rational<br>mutagenesis             | I223G-L466M                           | Improved product<br>specificity for 19-<br>hydroxy-manool                                                                   | <sup>29</sup> |
| <i>Coleus forskolii</i><br>CYP76AH15 | 13R-manoyl<br>oxide<br>oxidase           | Site-directed<br>mutagenesis        | A99I<br>S235G-Y236F<br>L366F<br>L366E | Improved catalytic<br>activity;<br>Enhanced production of<br>11-oxo-13R-manoyl<br>oxide                                     | <sup>58</sup> |

## SUPPLEMENTARY FIGURES

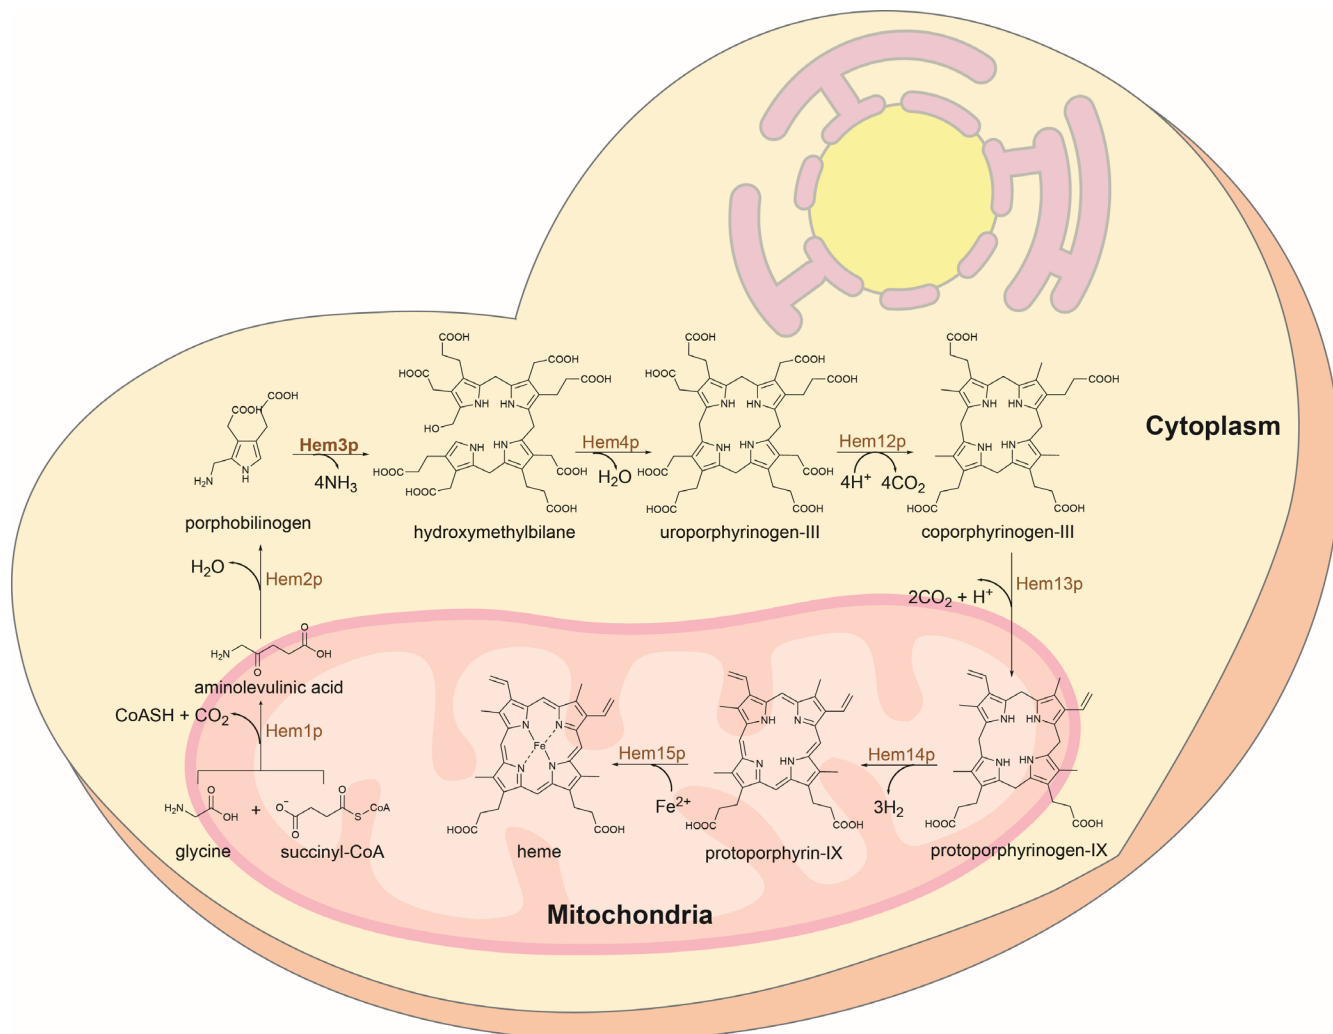

**Figure S1. Heme biosynthesis in yeast.** Heme biosynthesis starts with the decarboxylation of glycine and condensation reaction with succinyl-CoA and glycine to produce aminolaevulinic acid (ALA) in mitochondria. Subsequently, two ALA molecules are exported from the mitochondria to the cytosol to form porphobilinogen (PBG). Four units of PBG molecules are polymerized through deamination processes, and the chain is closed to form the characteristic coproporphyrinogen ring in heme structures. The coproporphyrinogen ring is transported to the mitochondria and goes through a series of modifications at its acetate and propionate side chains. Lastly, the insertion of a ferrous iron atom in the middle of the ring produces the final heme product. Rate limiting steps in heme biosynthesis are catalyzed by Hem3p followed by Hem2p and Hem12p<sup>59</sup>. Overexpression of HEM3 gene in yeast was found beneficial for terpene production<sup>27, 30, 60</sup>. Yeast enzymes are shown in brown, overexpressed enzymes are shown in bold.

## SUPPLEMENTARY SCHEMES

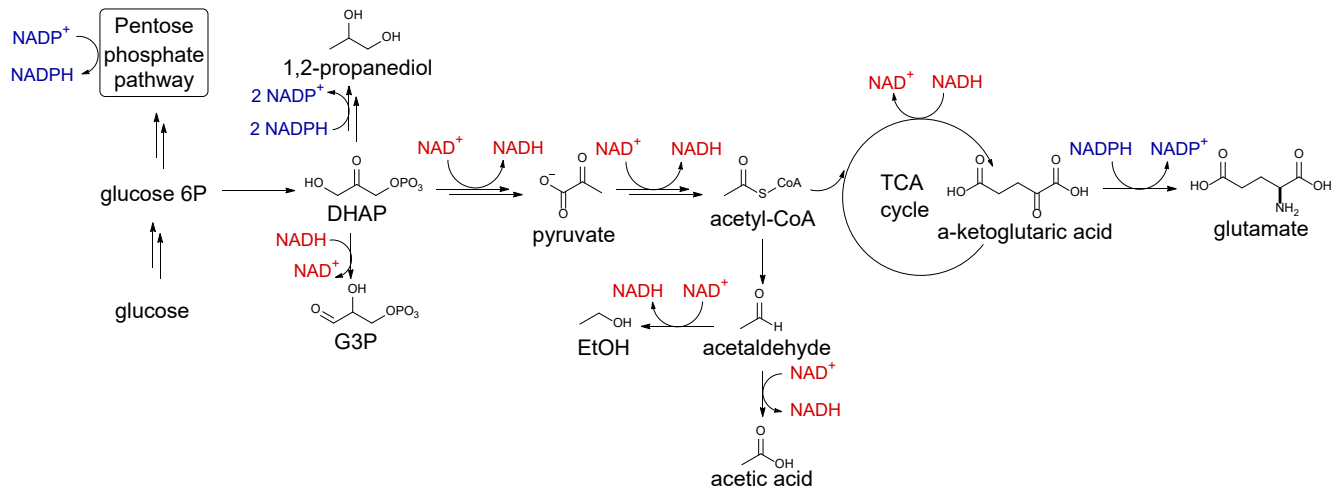

**Figure S2. Redox metabolism of NADH and NADPH in yeast.** NADH and NADPH cofactors donate electrons and hydrogens to reactions involved in yeast central metabolism. The ratio of NADH/NAD<sup>+</sup> (shown in red) and NADPH/NADP<sup>+</sup> (shown in blue) is crucial for redox reactions performed by different native enzymes. Any change to the intracellular redox balance could affect yeast metabolic network. Optimizing cofactor regeneration supports improved production of terpenoids.

### UDP-sugars synthesized in yeast

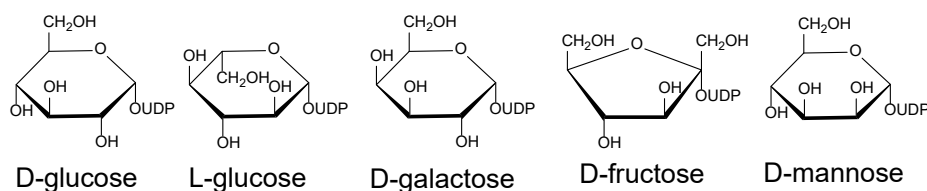

### UDP-sugars synthesized in plants

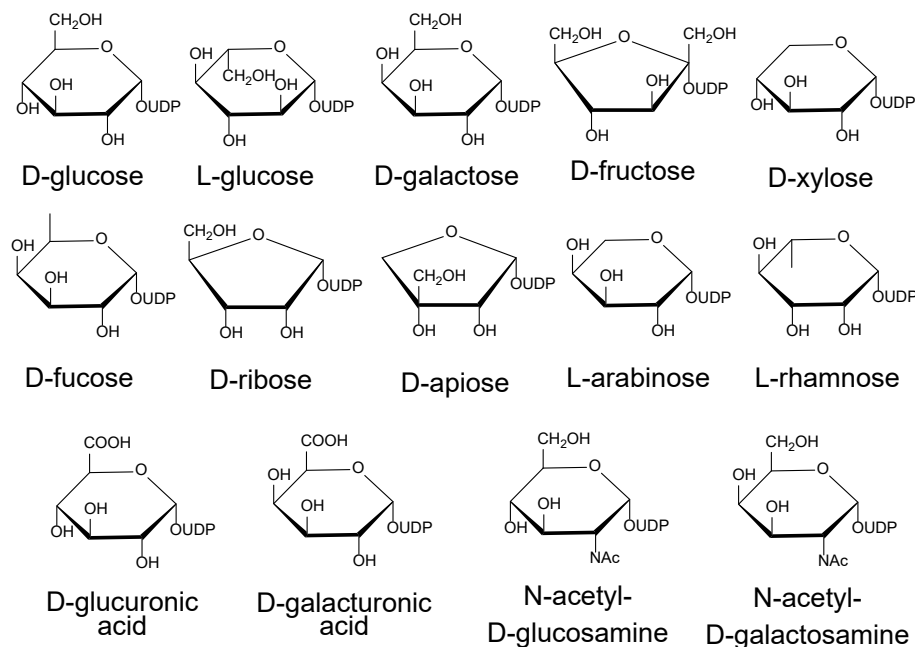

**Figure S3. UDP- sugars synthesized in yeast and plant.** Plant UDP-sugars, as essential components in the cell wall, have a highly diverse profile (bottom panel) in comparison with yeast counterparts (top panel). UDP-D-glucose is a common sugar highly conserved from bacteria to human and can be modified into different other UDP-sugars. With a rich cytosolic pool of UDP-D-glucose, yeast is a suitable platform for reconstruction of plant UDP-sugars that can further provide the fitted glycosylation residues for production of plant terpene glycosides or saponins.

## References:

1. B. Xing, D. Yang, H. Yu, B. Zhang, K. Yan, X. Zhang, R. Han and Z. Liang, *Plant Sci*, 2018, **276**, 229-238.
2. S. Mangas, E. Moyano, L. Osuna, R. M. Cusido, M. Bonfill and J. Palazón, *Biotechnol Lett*, 2008, **30**, 1853-1859.
3. B. Wang, A. B. Kashkooli, A. Sallets, H. M. Ting, N. C. A. de Ruijter, L. Olofsson, P. Brodelius, M. Pottier, M. Boutry, H. Bouwmeester and A. R. van der Krol, *Metab Eng*, 2016, **38**, 159-169.
4. L. Dong, E. Jongedijk, H. Bouwmeester and A. Van Der Krol, *New Phytol*, 2016, **209**, 679-690.
5. M. M. Hasan, H. S. Kim, J. H. Jeon, S. H. Kim, B. Moon, J. Y. Song, S. H. Shim and K. H. Baek, *Plant Cell Rep*, 2014, **33**, 895-904.
6. A. Anterola, E. Shanle, P. F. Perroud and R. Quatrano, *Transgenic research*, 2009, **18**, 655-660.
7. A. Einhaus, J. Steube, R. A. Freudenberg, J. Barczyk, T. Baier and O. Kruse, *Metab Eng*, 2022, **73**, 82-90.
8. P. K. Ajikumar, W. H. Xiao, K. E. Tyo, Y. Wang, F. Simeon, E. Leonard, O. Mucha, T. H. Phon, B. Pfeifer and G. Stephanopoulos, *Science*, 2010, **330**, 70-74.
9. Y. Li, Z. Lin, C. Huang, Y. Zhang, Z. Wang, Y. J. Tang, T. Chen and X. Zhao, *Metab Eng*, 2015, **31**, 13-21.
10. S. Sundaram, C. Diehl, N. S. Cortina, J. Bamberger, N. Paczia and T. J. Erb, *Angew Chem Int Ed Engl*, 2021, **60**, 16242-16242.
11. M. A. Valliere, T. P. Korman, M. A. Arbing and J. U. Bowie, *Nat Chem Biol*, 2020, **16**, 1427-1433.
12. J. Yuan and C. B. Ching, *Metab Eng*, 2016, **38**, 303-309.
13. C. J. Paddon, P. J. Westfall, D. J. Pitera, K. Benjamin, K. Fisher, D. McPhee, M. D. Leavell, A. Tai, A. Main, D. Eng, D. R. Polichuk, K. H. Teoh, D. W. Reed, T. Treynor, J. Lenihan, M. Fleck, S. Bajad, G. Dang, D. Dengrove, D. Diola, G. Dorin, K. W. Ellens, S. Fickes, J. Galazzo, S. P. Gaucher, T. Geistlinger, R. Henry, M. Hepp, T. Horning, T. Iqbal, H. Jiang, L. Kizer, B. Lieu, D. Melis, N. Moss, R. Regentin, S. Secrest, H. Tsuruta, R. Vazquez, L. F. Westblade, L. Xu, M. Yu, Y. Zhang, L. Zhao, J. Lievens, P. S. Covello, J. D. Keasling, K. K. Reiling, N. S. Renninger and J. D. Newman, *Nature*, 2013, **496**, 528-532.
14. W. Zha, F. Zhang, J. Shao, X. Ma, J. Zhu, P. Sun, R. Wu and J. Zi, *Nat Commun*, 2022, **13**, 2508.
15. C. Ignea, F. A. Trikkas, I. Kourtzelis, A. Argiriou, A. K. Kanellis, S. C. Kampranis and A. M. Makris, *Microb Cell Fact*, 2012, **11**, 162.
16. A. L. Meadows, K. M. Hawkins, Y. Tsegaye, E. Antipov, Y. Kim, L. Raetz, R. H. Dahl, A. Tai, T. Mahatdejkul-Meadows, L. Xu, L. Zhao, M. S. Dasika, A. Murarka, J. Lenihan, D. Eng, J. S. Leng, C. L. Liu, J. W. Wenger, H. Jiang, L. Chao, P. Westfall, J. Lai, S. Ganesan, P. Jackson, R. Mans, D. Platt, C. D. Reeves, P. R. Saija, G. Wichmann, V. F. Holmes, K. Benjamin, P. W. Hill, T. S. Gardner and A. E. Tsong, *Nature*, 2016, **537**, 694-697.
17. L. Albertsen, Y. Chen, L. S. Bach, S. Rattleff, J. Maury, S. Brix, J. Nielsen and U. H. Mortensen, *Appl Environ Microbiol*, 2011, **77**, 1033-1040.
18. S. Baek, J. C. Utomo, J. Y. Lee, K. Dalal, Y. J. Yoon and D. K. Ro, *Metab Eng*, 2021, **64**, 111-121.
19. B. Peng, L. Esquirol, Z. Lu, Q. Shen, L. C. Cheah, C. B. Howard, C. Scott, M. Trau, G. Dumsday and C. E. Vickers, *Nat Commun*, 2022, **13**, 2895.
20. B. Peng, M. R. Plan, P. Chrysanthopoulos, M. P. Hodson, L. K. Nielsen and C. E. Vickers, *Metab Eng*, 2017, **39**, 209-219.

21. C. Ignea, M. H. Raadam, M. S. Motawia, A. M. Makris, C. E. Vickers and S. C. Kampranis, *Nat Commun*, 2019, **10**, 3799.
22. S. Cheng, X. Liu, G. Jiang, J. Wu, J. L. Zhang, D. Lei, Y. J. Yuan, J. Qiao and G. R. Zhao, *ACS Synth Biol*, 2019, **8**, 968-975.
23. S. Dusseaux, W. T. Wajn, Y. Liu, C. Ignea and S. C. Kampranis, *Proc Natl Acad Sci U S A*, 2020, **117**, 31789-31799.
24. J. Li, K. Zhu, L. Miao, L. Rong, Y. Zhao, S. Li, L. Ma, J. Li, C. Zhang, D. Xiao, J. L. Foo and A. Yu, *ACS Synth Biol*, 2021, **10**, 884-896.
25. S. Liu, M. Zhang, Y. Ren, G. Jin, Y. Tao, L. Lyu, Z. K. Zhao and X. Yang, *Biotechnol Biofuels*, 2021, **14**, 243.
26. C. M. Denby, R. A. Li, V. T. Vu, Z. Costello, W. Lin, L. J. G. Chan, J. Williams, B. Donaldson, C. W. Bamforth, C. J. Petzold, H. V. Scheller, H. G. Martin and J. D. Keasling, *Nat Commun*, 2018, **9**, 965.
27. C. Ignea, A. Athanasakoglou, E. Ioannou, P. Georgantea, F. A. Triikka, S. Loupassaki, V. Roussis, A. M. Makris and S. C. Kampranis, *Proc Natl Acad Sci U S A*, 2016, **113**, 3681-3686.
28. X. Cao, W. Yu, Y. Chen, S. Yang, Z. K. Zhao, J. Nielsen, H. Luan and Y. J. Zhou, *Metab Eng*, 2023, **75**, 19-28.
29. C. Ignea, E. Ioannou, P. Georgantea, S. Loupassaki, F. A. Triikka, A. K. Kanellis, A. M. Makris, V. Roussis and S. C. Kampranis, *Metab Eng*, 2015, **28**, 91-103.
30. C. Ignea, A. Athanasakoglou, A. Andreadelli, M. Apostolaki, M. Iakovides, E. G. Stephanou, A. M. Makris and S. C. Kampranis, *Sci Rep*, 2017, **7**, 8855.
31. I. Pateraki, J. Andersen-Ranberg, N. B. Jensen, S. G. Wubshet, A. M. Heskes, V. Forman, B. Hallstrom, B. Hamberger, M. S. Motawia, C. E. Olsen, D. Staerk, J. Hansen, B. L. Moller and B. Hamberger, *eLife*, 2017, **6**, e23001.
32. R. Callari, Y. Meier, D. Ravasio and H. Heider, *Front Bioeng Biotechnol*, 2018, **6**.
33. B. Nowrouzi, R. A. Li, L. E. Walls, L. d'Espaux, K. Malcı, L. Liang, N. Jonguitud-Borrego, A. I. Lerma-Escalera, J. R. Morones-Ramirez, J. D. Keasling and L. Rios-Solis, *Microb Cell Fact*, 2020, **19**, 200.
34. B. Nowrouzi, L. Lungang and L. Rios-Solis, *Microb Cell Fact*, 2022, **21**, 197.
35. L. E. Walls, J. L. Martinez, E. A. Del Rio Chanona and L. Rios-Solis, *Biotechnol J*, 2022, **17**, e2100414.
36. K. Zhou, K. Qiao, S. Edgar and G. Stephanopoulos, *Nat biotechnol*, 2015, **33**, 377-383.
37. N. L. Hansen, L. Kjaerulff, Q. K. Heck, V. Forman, D. Staerk, B. L. Møller and J. Andersen-Ranberg, *Nat Commun*, 2022, **13**, 5011.
38. M. Salmon, R. B. Thimmappa, R. E. Minto, R. E. Melton, R. K. Hughes, P. E. O'Maille, A. M. Hemmings and A. Osbourn, *Proc Natl Acad Sci U S A*, 2016, **113**, E4407-4414.
39. N. L. Hansen, K. Miettinen, Y. Zhao, C. Ignea, A. Andreadelli, M. H. Raadam, A. M. Makris, B. L. Moller, D. Staerk, S. Bak and S. C. Kampranis, *Microb Cell Fact*, 2020, **19**, 15.
40. Z. Dai, Y. Liu, X. Zhang, M. Shi, B. Wang, D. Wang, L. Huang and X. Zhang, *Metab Eng*, 2013, **20**, 146-156.
41. C. C. Jin, J. L. Zhang, H. Song and Y. X. Cao, *Microb Cell Fact*, 2019, **18**, 77.
42. J. N. Bröker, B. Müller, N. van Deenen, D. Prüfer and C. Schulze Gronover, *Appl Microbiol Biotechnol*, 2018, **102**, 6923-6934.
43. S. C. Jung, W. Kim, S. C. Park, J. Jeong, M. K. Park, S. Lim, Y. Lee, W. T. Im, J. H. Lee, G. Choi and S. C. Kim, *Plant Cell Physiol*, 2014, **55**, 2177-2188.
44. W. Wei, P. Wang, Y. Wei, Q. Liu, C. Yang, G. Zhao, J. Yue, X. Yan and Z. Zhou, *Mol Plant*, 2015, **8**, 1412-1424.
45. P. Wang, W. Wei, W. Ye, X. Li, W. Zhao, C. Yang, C. Li, X. Yan and Z. Zhou, *Cell Discov*, 2019, **5**, 5.

46. C. Li, X. Yan, Z. Xu, Y. Wang, X. Shen, L. Zhang, Z. Zhou and P. Wang, *Commun Biol*, 2022, **5**, 775.
47. T. Ma, B. Shi, Z. Ye, X. Li, M. Liu, Y. Chen, J. Xia, J. Nielsen, Z. Deng and T. Liu, *Metab Eng*, 2019, **52**, 134-142.
48. H. Rabeharindranto, S. Castano-Cerezo, T. Lautier, L. F. Garcia-Alles, C. Treitz, A. Tholey and G. Truan, *Metab Eng Commun*, 2019, **8**, e00086.
49. X. K. Zhang, D. N. Wang, J. Chen, Z. J. Liu, L. J. Wei and Q. Hua, *Biotechnol Lett*, 2020, **42**, 945-956.
50. M. Qi, B. Zhang, L. Jiang, S. Xu, C. Dong, Y. L. Du, Z. Zhou, L. Huang, Z. Xu and J. Lian, *Front Bioeng Biotechnol*, 2020, **8**, 613771.
51. Y. Yuan, E. Andersen and H. Zhao, *ACS Synth Biol*, 2016, **5**, 46-52.
52. Z. Cui, H. Zheng, J. Zhang, Z. Jiang, Z. Zhu, X. Liu, Q. Qi and J. Hou, *Appl Environ Microbiol*, 2021, **87**.
53. C. Ignea, M. Pontini, M. E. Maffei, A. M. Makris and S. C. Kampranis, *ACS Synth Biol*, 2014, **3**, 298-306.
54. C. Ignea, F. A. Trikka, A. K. Nikolaidis, P. Georgantea, E. Ioannou, S. Loupassaki, P. Kefalas, A. K. Kanellis, V. Roussis, A. M. Makris and S. C. Kampranis, *Metab Eng*, 2015, **27**, 65-75.
55. B. Peng, L. K. Nielsen, S. C. Kampranis and C. E. Vickers, *Metab Eng*, 2018, **47**, 83-93.
56. C. Ignea, M. Pontini, M. S. Motawia, M. E. Maffei, A. M. Makris and S. C. Kampranis, *Nat Chem Biol*, 2018, **14**, 1090-1098.
57. Z. Yao, P. Zhou, B. Su, S. Su, L. Ye and H. Yu, *ACS Synth Biol*, 2018, **7**, 2308-2316.
58. V. Forman, N. Bjerg-Jensen, J. D. Dyekjær, B. L. Møller and I. Pateraki, *Microb Cell Fact*, 2018, **17**, 181.
59. J. K. Michener, J. Nielsen and C. D. Smolke, *Proc Natl Acad Sci U S A*, 2012, **109**, 19504-19509.
60. C. Ignea, E. Ioannou, P. Georgantea, F. A. Trikka, A. Athanasakoglou, S. Loupassaki, V. Roussis, A. M. Makris and S. C. Kampranis, *Microb Cell Fact*, 2016, **15**, 46.
